# Supplementary material for: Risk of ischemic stroke after atrial fibrillation diagnosis: A national sample cohort
Source: PubMed Central journal article supplement (PMC5479557; doi:10.1371/journal.pone.0179687), 2017-06-21
Supplement: pone.0179687.s001.pdf [file pone.0179687.s001.pdf]

Total estimated warfarin exposure = 135 days

Case 1:

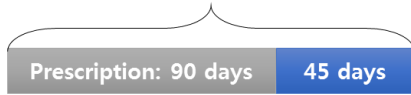

Total estimated warfarin exposure = 240 days

Case 2:

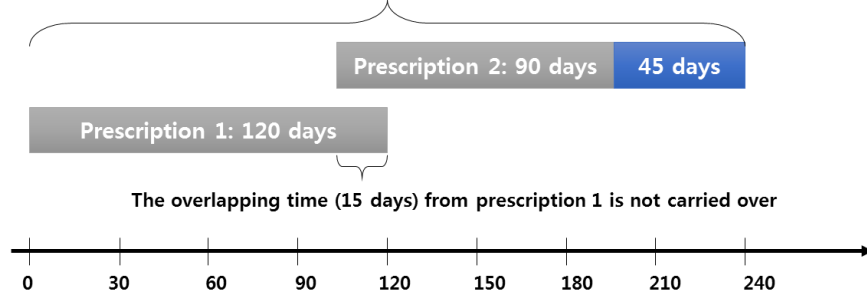

S1 Fig. The estimation of continuous warfarin exposure
