# Supplementary material for: Risk of ischemic stroke after atrial fibrillation diagnosis: A national sample cohort
Source: PubMed Central journal article supplement (PMC5479557; doi:10.1371/journal.pone.0179687), 2017-06-21
Supplement: pone.0179687.s002.pdf [file pone.0179687.s002.pdf]

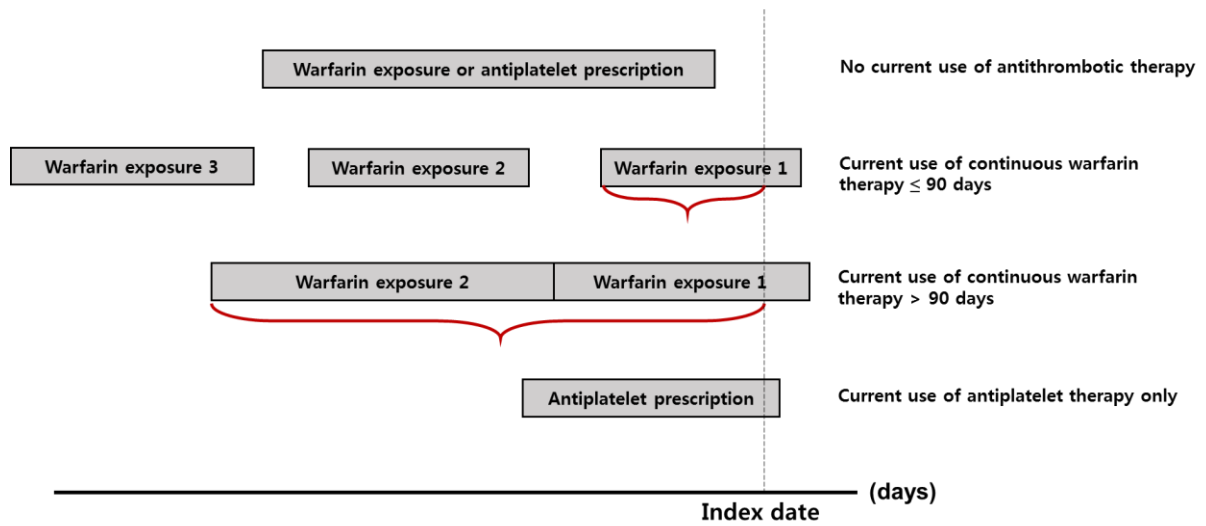

S2 Fig. Current use of continuous antithrombotic therapy
