# Supplementary material for: Risk of ischemic stroke after atrial fibrillation diagnosis: A national sample cohort
Source: PubMed Central journal article supplement (PMC5479557; doi:10.1371/journal.pone.0179687), 2017-06-21
Supplement: pone.0179687.s003.pdf [file pone.0179687.s003.pdf]

**A**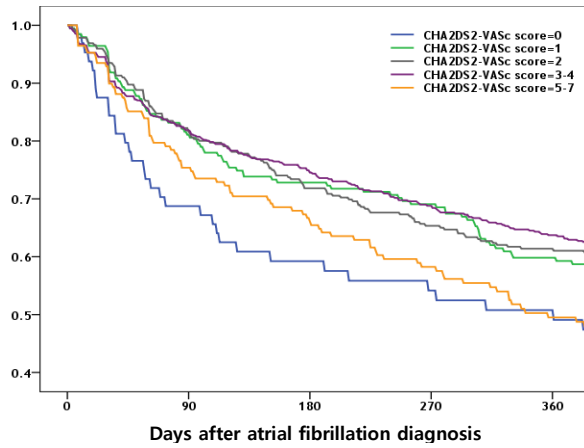**B**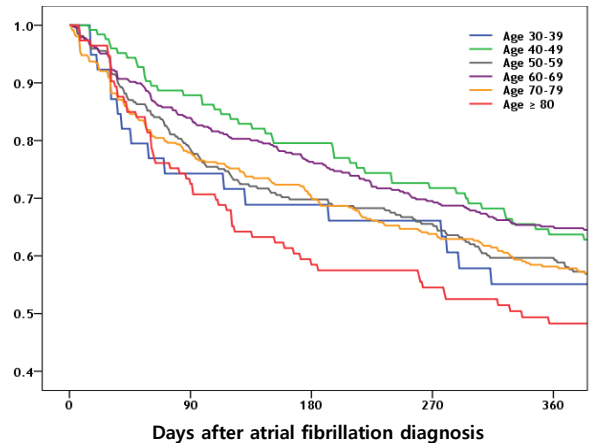

S3 Fig. Proportion of the patients receiving warfarin after atrial fibrillation diagnosis whose warfarin therapy continued during follow-up. (A) CHA<sub>2</sub>DS<sub>2</sub>-VASc score and (B) age subgroups. Warfarin treatment was defined as continuous when the warfarin exposure periods (prescription coverage plus 45 days) overlapped each other.
