# Supplementary material for: Risk of ischemic stroke after atrial fibrillation diagnosis: A national sample cohort
Source: PubMed Central journal article supplement (PMC5479557; doi:10.1371/journal.pone.0179687), 2017-06-21
Supplement: pone.0179687.s004.pdf [file pone.0179687.s004.pdf]

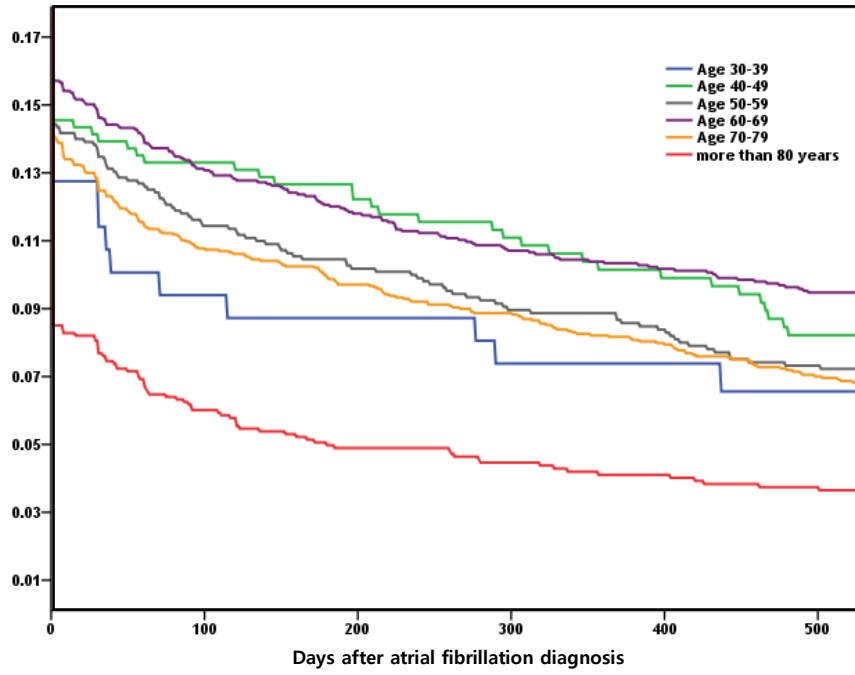

S4 Fig. Proportion of patients with CHA<sub>2</sub>DS<sub>2</sub>-VASc scores of  $\geq 2$  who received continuous warfarin therapy after atrial fibrillation diagnosis.
