# Supplementary material for: Risk of ischemic stroke after atrial fibrillation diagnosis: A national sample cohort
Source: PubMed Central journal article supplement (PMC5479557; doi:10.1371/journal.pone.0179687), 2017-06-21
Supplement: pone.0179687.s005.pdf [file pone.0179687.s005.pdf]

S1 Table. Frequency of patients in each age subgroup with CHA<sub>2</sub>DS<sub>2</sub>-VASc scores of 0, 1, 2, 3–4, and 5–7 at atrial fibrillation diagnosis

|                                           | Age, years                |                            |                            |                            |                            |                          | Total<br>( <i>n</i> =10654) |
|-------------------------------------------|---------------------------|----------------------------|----------------------------|----------------------------|----------------------------|--------------------------|-----------------------------|
|                                           | 30–39<br>( <i>n</i> =691) | 40–49<br>( <i>n</i> =1284) | 50–59<br>( <i>n</i> =2150) | 60–69<br>( <i>n</i> =2575) | 70–79<br>( <i>n</i> =2613) | ≥80<br>( <i>n</i> =1341) |                             |
| <b>CHA<sub>2</sub>DS<sub>2</sub>-VASc</b> |                           |                            |                            |                            |                            |                          |                             |
| <b>score</b>                              |                           |                            |                            |                            |                            |                          |                             |
| 0                                         | 199 (28.8)                | 286 (22.3)                 | 269 (12.5)                 | 103 (4.0)                  | 0 (0.0)                    | 0 (0.0)                  | 857 (8.0)                   |
| 1                                         | 343 (49.6)                | 513 (40.0)                 | 738 (34.3)                 | 447 (17.4)                 | 109 (4.2)                  | 0 (0.0)                  | 2150 (20.2)                 |
| 2                                         | 110 (15.9)                | 307 (23.9)                 | 727 (33.8)                 | 745 (28.9)                 | 388 (14.8)                 | 49 (3.7)                 | 2326 (21.8)                 |
| 3–4                                       | 39 (5.6)                  | 177 (13.8)                 | 410 (19.1)                 | 1157 (44.9)                | 1455 (55.7)                | 630 (47.0)               | 3868 (36.3)                 |
| 5–7                                       | 0 (0.0)                   | 1 (0.1)                    | 6 (0.3)                    | 123 (4.8)                  | 661 (25.3)                 | 662 (49.4)               | 1453 (13.6)                 |

The data are reported as *n* (%).
